# Supplementary material for: Time-resolved infra-red studies of photo-excited porphyrins in the presence of nucleic acids and in HeLa tumour cells: insights into binding site and electron transfer dynamics
Source: Royal Society of Chemistry journal article supplement (doi:10.1039/d2cp04604k), 2022-01-01
Supplement: d2cp04604k1.pdf [file d2cp04604k1.pdf]

## Electronic Supporting Information

### Time-resolved infra-red studies of photo-excited porphyrins in the presence of nucleic acids and in HeLa tumour cells: insights into binding site and electron transfer dynamics

Páraic M. Keane,<sup>ab\*</sup> Clara Zehe,<sup>c</sup> Fergus E. Poynton,<sup>ad</sup> Sandra A. Bright,<sup>ad</sup> Sandra Estayalo-Adrián,<sup>ad</sup> Stephen J. Devereux,<sup>c</sup> Paul M. Donaldson,<sup>e</sup> Igor V. Sazanovich,<sup>e</sup> Michael Towrie,<sup>e</sup> Stanley W. Botchway,<sup>e</sup> Christine J. Cardin,<sup>b</sup> D. Clive Williams,<sup>d</sup> Thorfinnur Gunnlaugsson,<sup>ad</sup> Conor Long,<sup>f\*</sup> John M. Kelly,<sup>a\*</sup> Susan J. Quinn<sup>c\*</sup>

<sup>a</sup>School of Chemistry, Trinity College Dublin, Dublin 2, Ireland.

email: [keanepa@tcd.ie](mailto:keanepa@tcd.ie); [jmkelly@tcd.ie](mailto:jmkelly@tcd.ie)

<sup>b</sup>School of Chemistry, University of Reading. Whiteknights, Reading RG6 6AD, U.K.

<sup>c</sup>School of Chemistry, University College Dublin, Dublin 4, Ireland

email: [susan.quinn@ucd.ie](mailto:susan.quinn@ucd.ie)

<sup>d</sup>Trinity Biomedical Sciences Institute, The University of Dublin, Pearse St., Dublin 2, Ireland

<sup>e</sup>STFC Central Laser Facility, Research Complex at Harwell, Rutherford Appleton Laboratory, Didcot OX11 0QX, U.K.

<sup>f</sup>School of Chemical Sciences, Dublin City University, Dublin 9, Ireland

email: [conor.long@dcu.ie](mailto:conor.long@dcu.ie)

## Figures

- Fig. S1** Ps-TRIR spectra of PtTMPyP4 (500  $\mu$ M) in phosphate-buffered D<sub>2</sub>O and kinetics at 1518  $\text{cm}^{-1}$  and 1636  $\text{cm}^{-1}$
- Fig. S2** Exponential fits to PtTMPyP4, unbound and in the presence of nucleic acids, at 1620  $\text{cm}^{-1}$
- Fig. S3** Ps-TA spectra of PtTMPyP4, PtTMPyP4 + GMP and PtTMPyP4 + {d(GC)<sub>5</sub>}<sub>2</sub> following 400 nm excitation.
- Fig. S4** Monoexponential fitting of TMPyP4 at 1638  $\text{cm}^{-1}$  and 1513  $\text{cm}^{-1}$
- Fig. S5** Comparison of H/D substitution on calculated IR spectra of ground state, singlet excited state and one-electron reduced species.
- Fig. S6** Exponential fits to TMPyP4, TMPyP4-GMP, TMPyP4-{d(GC)<sub>5</sub>}<sub>2</sub>, TMPyP4-{d(CGCAAATTTGCG)}<sub>2</sub> and TMPyP4-cMYC unbound and in the presence of nucleic acids, at 1620  $\text{cm}^{-1}$
- Fig. S7** Kinetics of transient (1636  $\text{cm}^{-1}$ ) and bleach (1646  $\text{cm}^{-1}$ ) for TMPyP4 + GMP, TMPyP4 + {d(GC)<sub>5</sub>}<sub>2</sub> and TMPyP4 + c-MYC quadruplex
- Fig. S8** Ps-TA spectra of TMPyP4, TMPyP4-GMP and TMPyP4-{d(GC)<sub>5</sub>}<sub>2</sub>
- Fig. S9** Biexponential fit of ps-TA of TMPyP4-GMP at 460 nm and 430 nm

- Fig. S10** UV/Visible absorption spectra of fixed HeLa cells in the absence of treatment and after treatment with PtTMPyP4 (100  $\mu\text{M}$ ) for 4 h
- Fig. S11** UV/Visible absorption spectrum PtTMPyP4 (20  $\mu\text{M}$ ) in cell culture medium.
- Fig. S12** FTIR spectrum of fixed HeLa cells, fixed HeLa cells that were treated with PtTMPyP4 (100  $\mu\text{M}$ ) for 4 h
- Fig. S13** Ps-TRIR spectra of untreated methanol-fixed HeLa cells
- Fig. S14** Comparison of calculated [PtTMPyP4]<sup>3+</sup> reduced state with the calculated ground state (singlet) and triplet state of PtTMPyP4, and calculated difference spectrum obtained for the porphyrin triplet and the reduced state

## Tables

- Table S1** Exponential fitting parameters
- Table S2** The calculated IR absorptions of PtTMPyP4 with intensities greater than 10 ( $\text{M}^{-1} \text{cm}^{-1}$ ) in the 1450 to 1700  $\text{cm}^{-1}$  region with assignments based on the largest displacement vectors
- Table S3** Table of structural parameters for optimised PtTMPyP4 including atom numbering used
- Table S4** Coordinates of the optimised ground state of PtTMPyP4 in water
- Table S5** Coordinates of the optimised ground state of D<sub>2</sub>TMPyP4 in water
- Table S6** Coordinates of the optimised first singlet excited state of D<sub>2</sub>TMPyP4 in water
- Table S7** TRIR kinetic fits – TMPyP4 + GMP/{d(GC)<sub>5</sub>}<sub>2</sub>
- Table S8** Biexponential fits to ps-TA data of TMPyP4-GMP

## Experimental

## References

## Figures and Tables

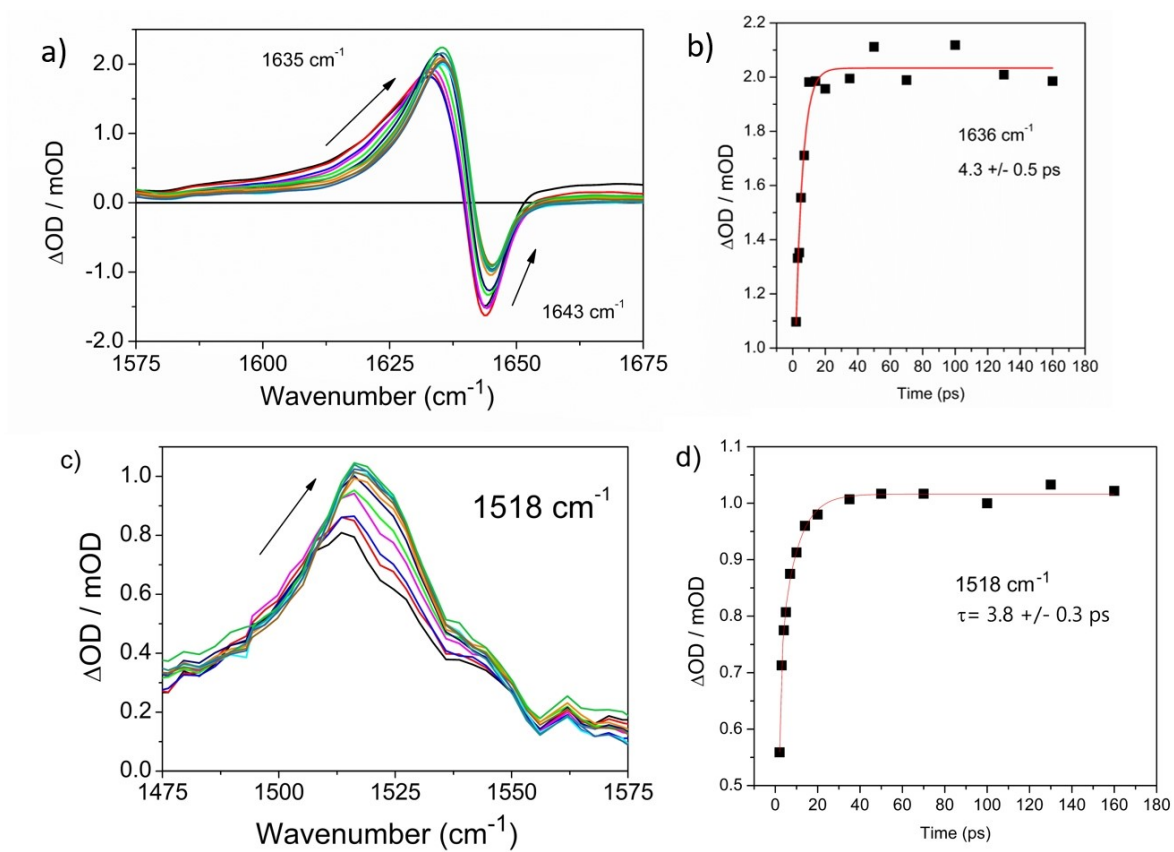

**Fig. S1** (a) ps-TRIR spectra of PtTMPyP4 (500  $\mu\text{M}$ ) in phosphate-buffered (50 mM, pH 7)  $\text{D}_2\text{O}$  between 1575 and 1675  $\text{cm}^{-1}$  after 400 nm excitation (1  $\mu\text{J}$ , 10 kHz) at delays between 1 – 200 ps. (b) kinetics at 1636  $\text{cm}^{-1}$ , (c) ps-TRIR spectra recorded between 1475 – 1575  $\text{cm}^{-1}$  and (d) the kinetics at 1518  $\text{cm}^{-1}$ .

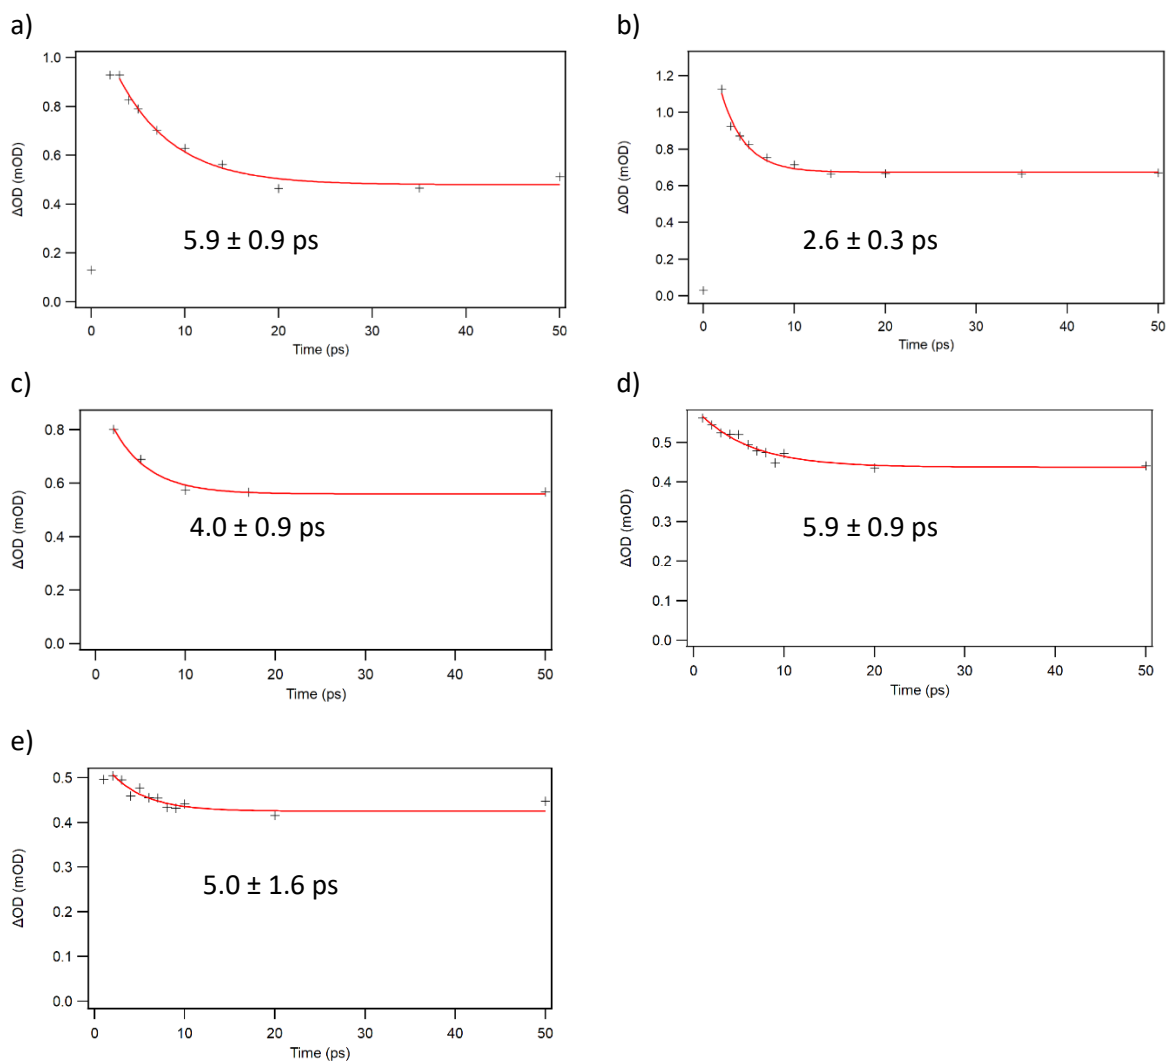

**Fig. S2** Exponential fits to PtTMPyP4, unbound and in the presence of nucleic acids, at  $1620\text{ cm}^{-1}$  (a) PtTMPyP4, (b) PtTMPyP4-GMP, (c) PtTMPyP4- $\{(GC)_5\}_2$ , (d) PtTMPyP4- $\{d(CGCAAATTTGCG)\}_2$ , (e) PtTMPyP4-cMYC. Lifetime values shown under plots

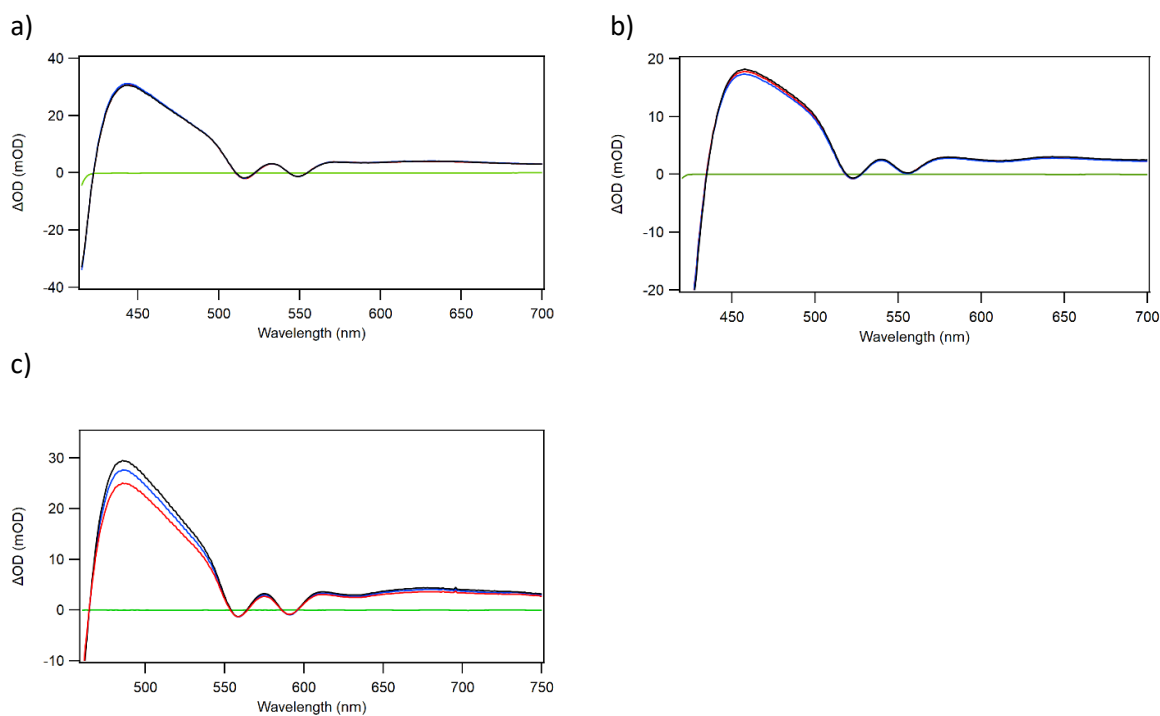

**Fig. S3** Ps-TA spectra of (a) PtTMPyP4, (b) PtTMPyP4 + GMP and (c) PtTMPyP4 + {d(GC)<sub>5</sub>}<sub>2</sub> following 400 nm excitation. Delays shown at 3 (red), 10 (blue) and 50 ps (black)

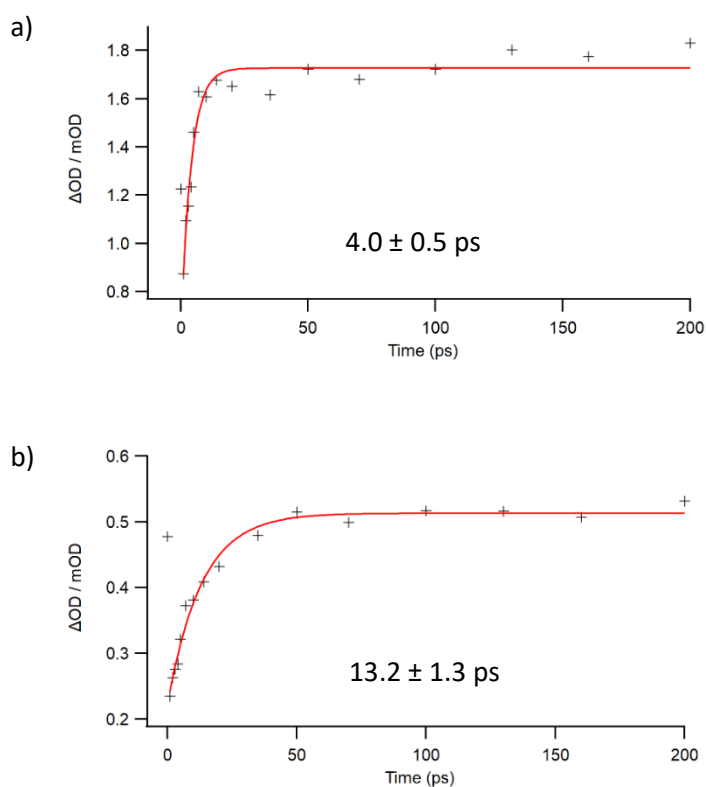

**Fig. S4** Monoexponential fitting for TMPyP4 at (a) 1638 cm<sup>-1</sup> (b) 1513 cm<sup>-1</sup>. Lifetime values shown under plots

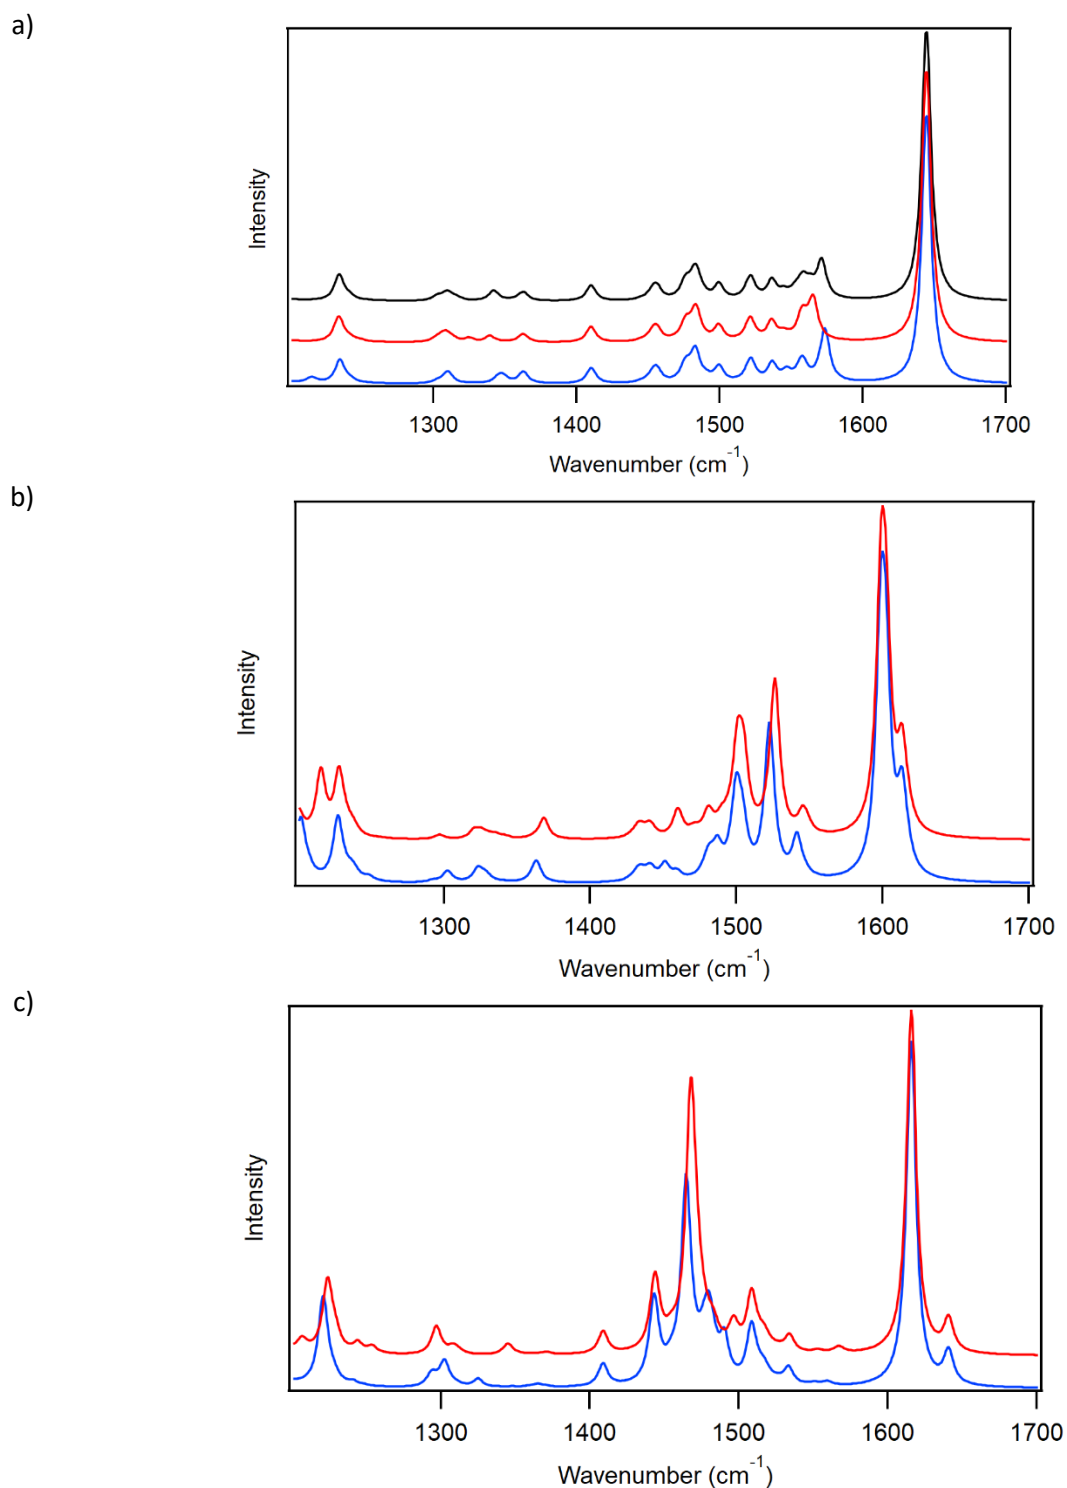

**Fig. S5** Comparison of H/D substitution on calculated IR spectra: (a) ground state (b) singlet excited state (c) one-electron reduced species. Red = H<sub>2</sub>TMPyP4, Blue = D<sub>2</sub>TMPyP4. Black = HDTMPyP4 for (a) only.

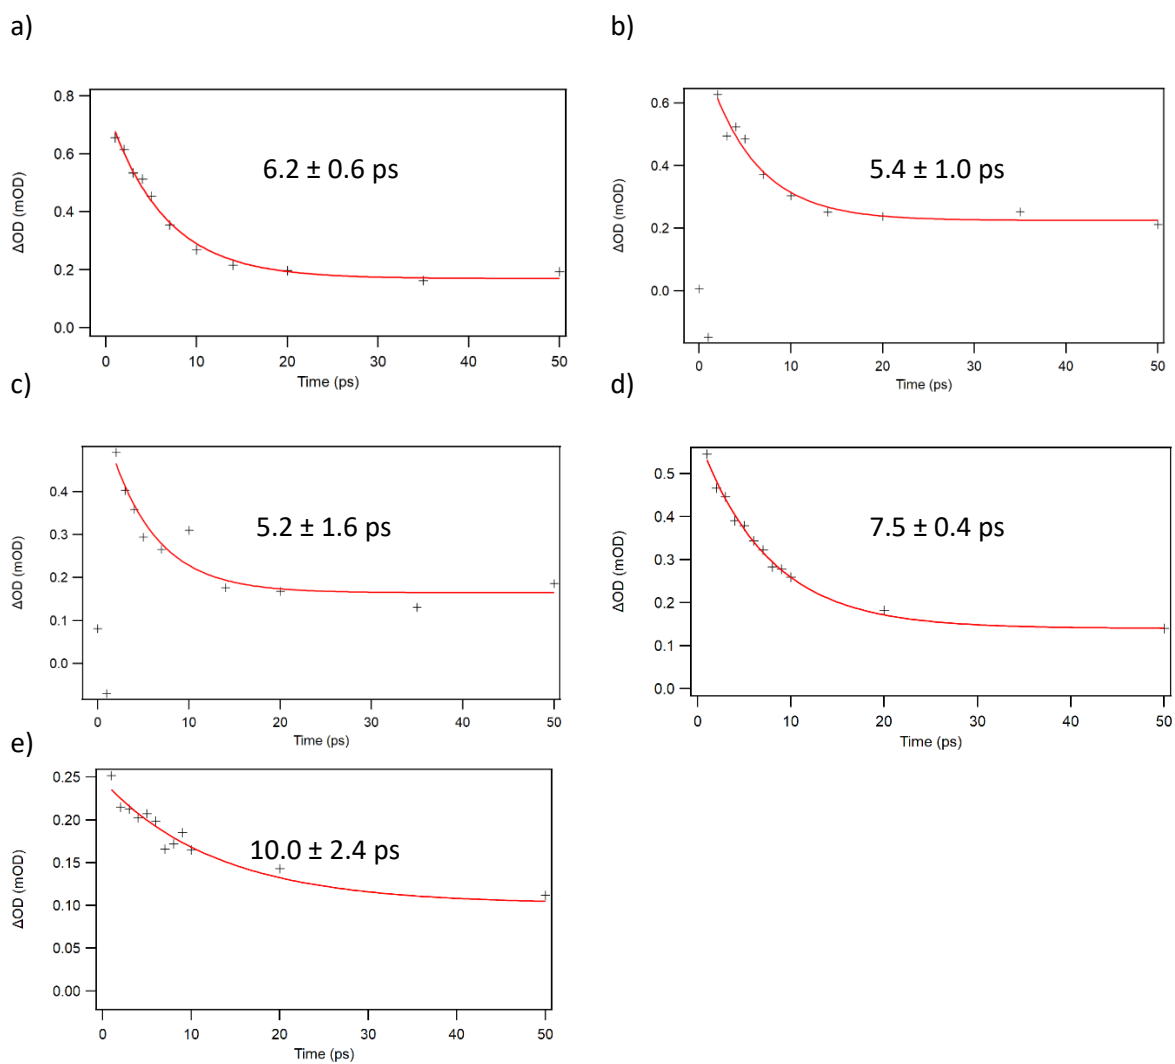

**Fig. S6** Exponential fits to (a) TMPyP4, (b) TMPyP4-GMP, (c) TMPyP4- $\{d(GC)_5\}_2$  (d) TMPyP4- $\{d(CGCAAATTTGCG)\}_2$  (e) TMPyP4-cMYC unbound and in presence of nucleic acids, at  $1620\text{ cm}^{-1}$

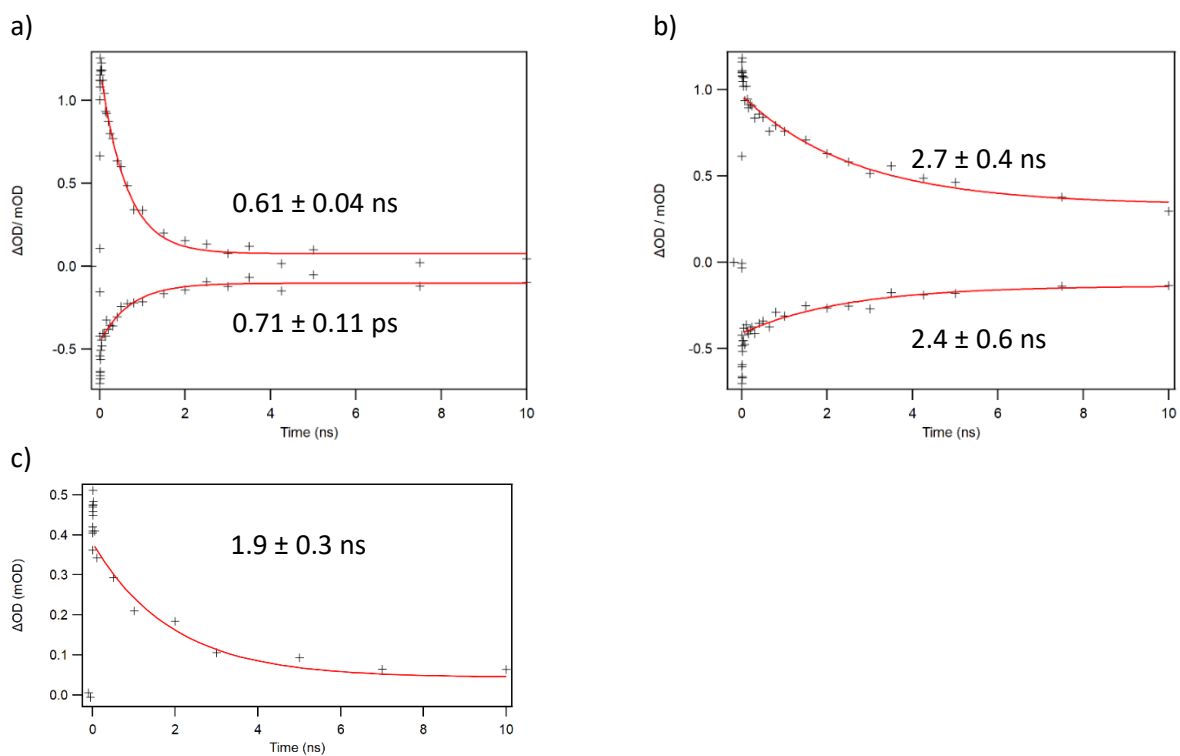

**Fig. S7** Kinetics of transient (1636 cm<sup>-1</sup>) and bleach (where applicable, 1646 cm<sup>-1</sup>) for (a) TMPyP4 + GMP (b) TMPyP4 + {d(GC)<sub>5</sub>}<sub>2</sub> (c) TMPyP4 + c-MYC quadruplex. Mononexponential fits shown from 50 ps onwards. Fitted lifetime values shown on plots



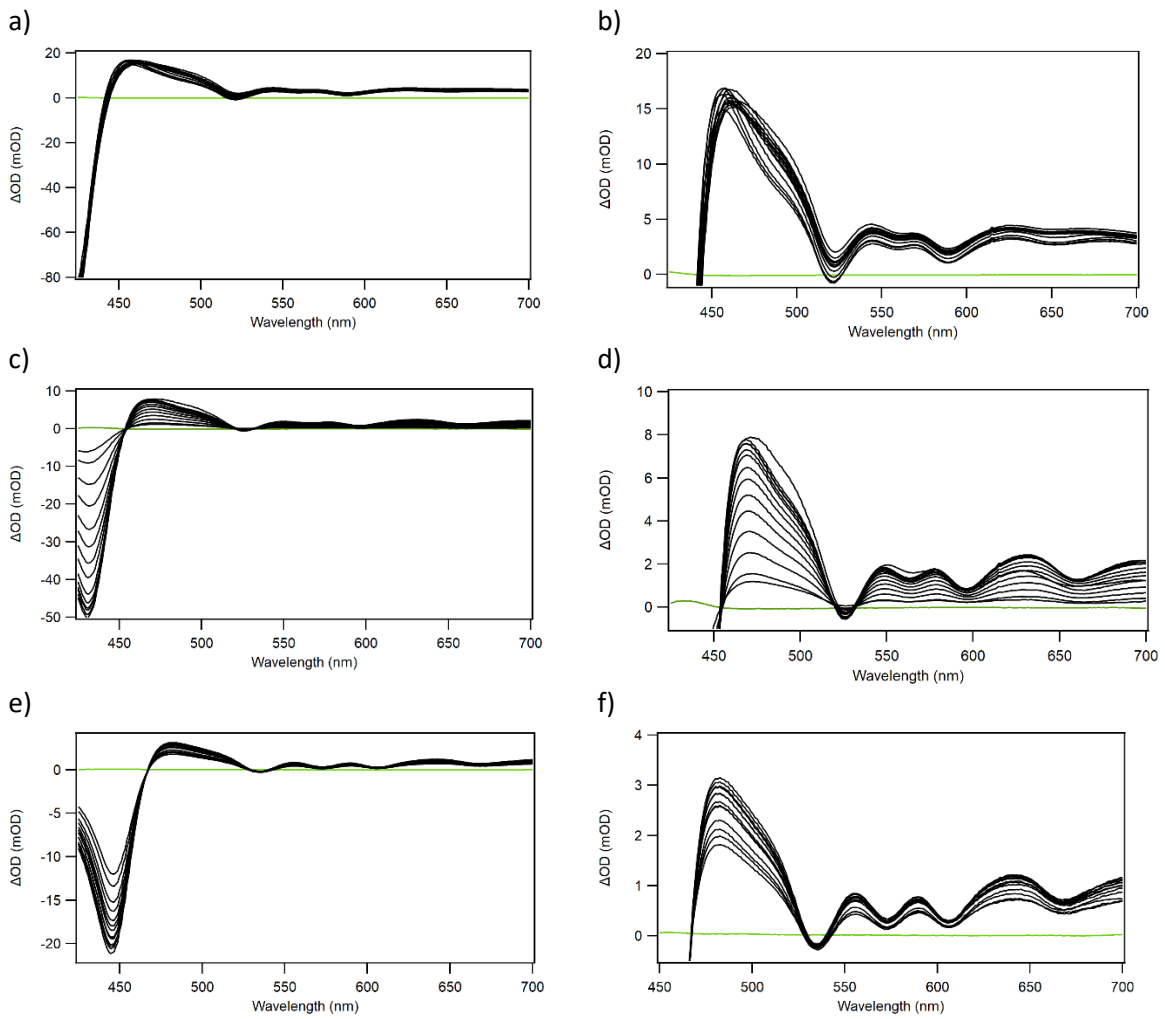

**Fig. S8** Ps-TA spectra of (a) TMPyP4 (b) TMPyP4 transient only (c) TMPyP4-GMP (d) TMPyP4-GMP transient only (e) TMPyP4- $\{d(GC)_5\}_2$  (f) TMPyP4- $\{d(GC)_5\}_2$  transient only. 400 nm exc., 1  $\mu$ M

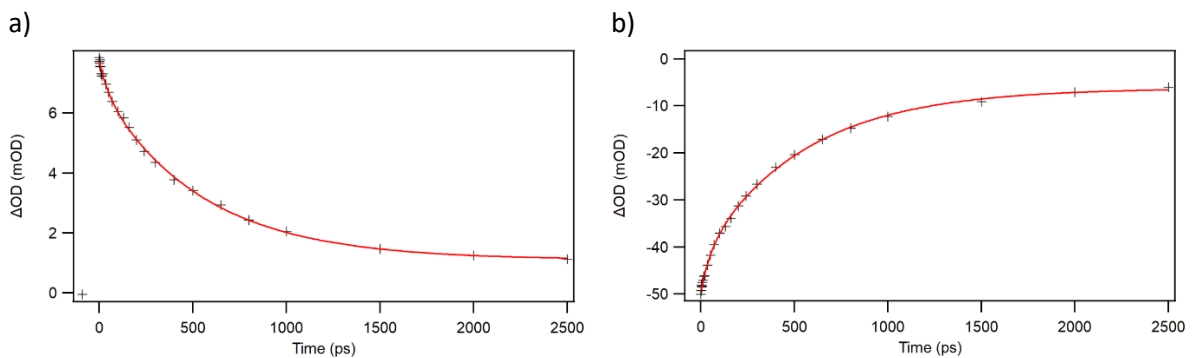

**Fig. S9** Biexponential fit of ps-TA of TMPyP4-GMP at (a) 460 nm (b) 430 nm. 400 nm exc.

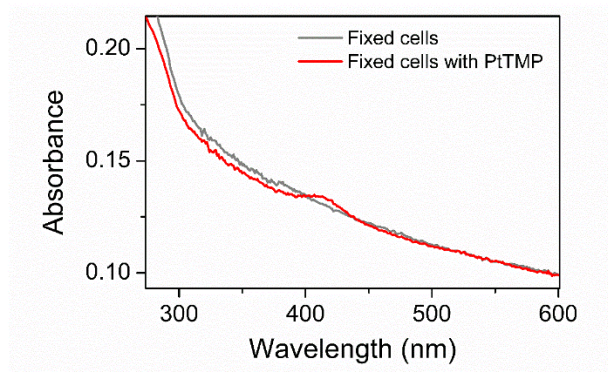

**Fig. S10** UV/Visible absorption spectra of fixed HeLa cells in the absence of treatment (grey) and after treatment with PtTMPyP4 (100  $\mu$ M) for 4 h (red).

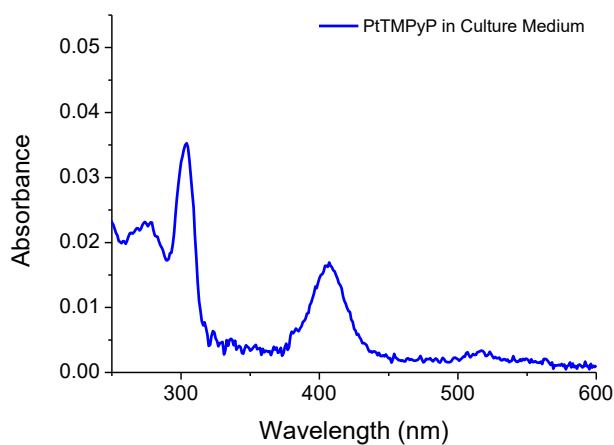

**Fig. S11** UV/Visible absorption spectrum of PtTMPyP4 (20  $\mu$ M) in cell culture medium.

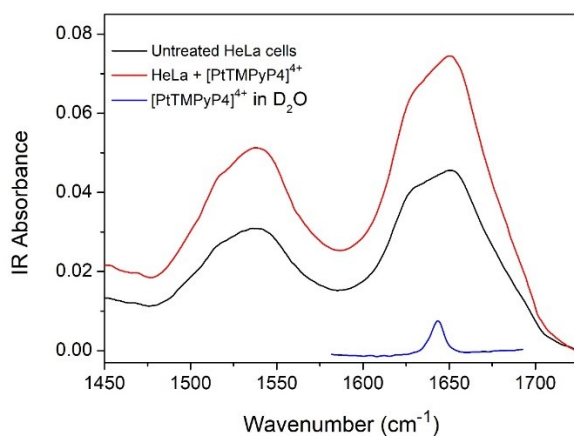

**Fig. S12** FTIR spectrum of (a) fixed HeLa cells (b) fixed HeLa cells that were treated with PtTMPyP4 (100  $\mu$ M) for 4 h and (c) PtTMPyP4 (800  $\mu$ M) in  $D_2O$ .

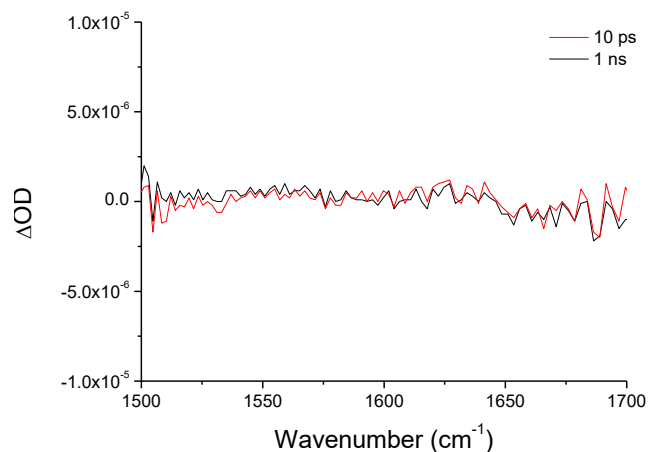

**Fig. S13** Ps-TRIR spectra of untreated methanol-fixed HeLa cells after 400 nm excitation (200 nJ, 50 kHz) at 10 ps and 1 ns time delays.

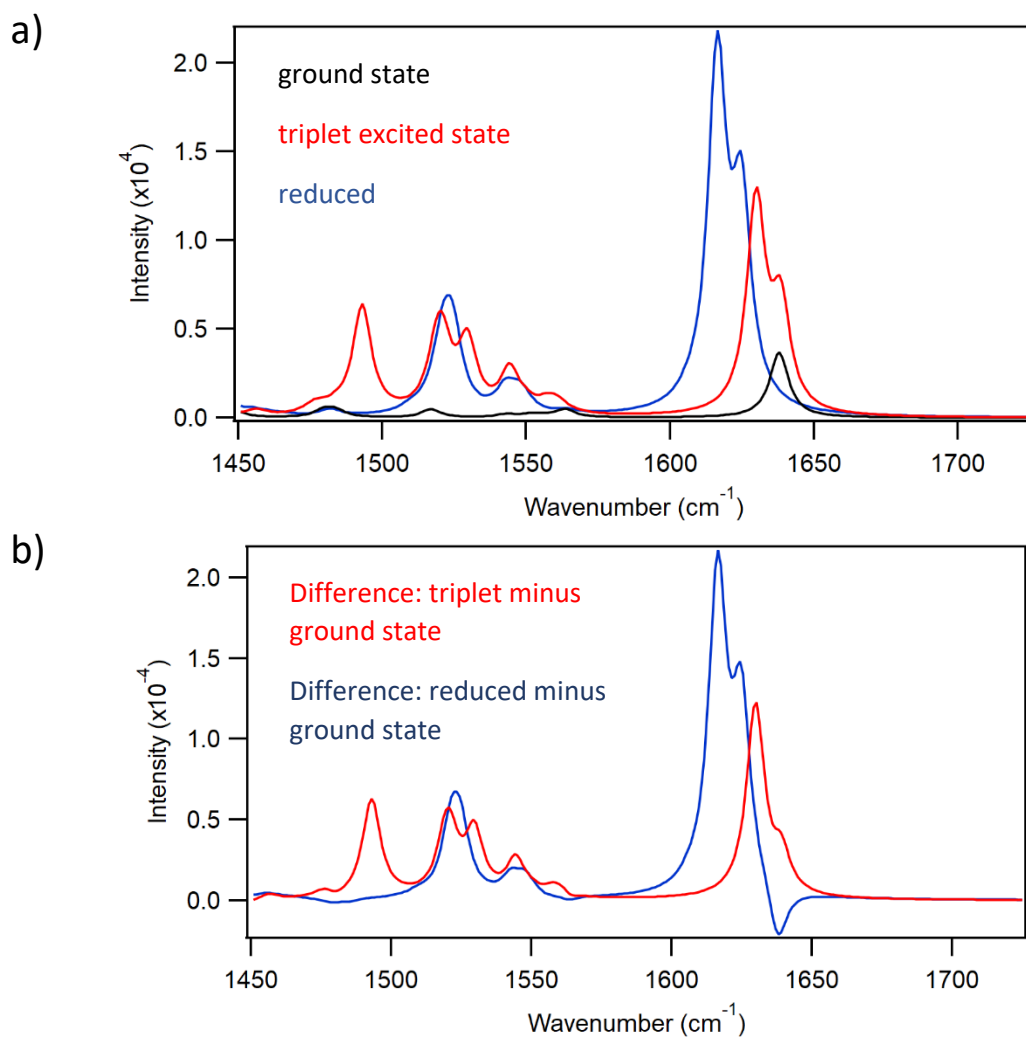

**Fig. S14** (a) Comparison of calculated  $[\text{PtTMPyP4}]^{3+}$  reduced state with the calculated ground state (singlet) and triplet state of PtTMPyP4. (b) calculated difference spectrum obtained for the porphyrin triplet and the reduced state

**Table S1** Exponential fitting parameters for presumed vibrational cooling.

| system                                      | wavenumber (cm <sup>-1</sup> ) | $\tau$ (ps) |
|---------------------------------------------|--------------------------------|-------------|
| PtTMPyP4                                    | 1636                           | 4.3 ± 0.5   |
| PtTMPyP4                                    | 1518                           | 3.8 ± 0.3   |
| PtTMPyP4                                    | 1620                           | 5.9 ± 0.9   |
| PtTMPyP4-GMP                                | 1620                           | 2.6 ± 0.3   |
| PtTMPyP4-{d(GC) <sub>5</sub> } <sub>2</sub> | 1620                           | 4.0 ± 0.9   |
| PtTMPyP4-{d(CGAAATTTGCG)} <sub>2</sub>      | 1620                           | 5.9 ± 0.9   |
| PtTMPyP4-cMYC                               | 1620                           | 5.0 ± 1.6   |
| TMPyP4                                      | 1638                           | 4.0 ± 0.5   |
| TMPyP4                                      | 1513                           | 13.2 ± 1.3  |
| TMPyP4                                      | 1620                           | 6.2 ± 0.6   |
| TMPyP4-GMP                                  | 1620                           | 5.4 ± 1.0   |
| TMPyP4-{d(GC) <sub>5</sub> } <sub>2</sub>   | 1620                           | 5.2 ± 1.6   |
| TMPyP4-{d(CGAAATTTGCG)} <sub>2</sub>        | 1620                           | 7.5 ± 0.4   |
| TMPyP4-cMYC                                 | 1620                           | 10.0 ± 2.4  |

**Table S2** The calculated IR PtTMPyP4 absorptions with intensities greater than 10 (M<sup>-1</sup> cm<sup>-1</sup>) in the 1450 to 1700 cm<sup>-1</sup> region with assignments based on the largest displacement vectors

| Mode Number | Wavenumber |                        | Intensity | Description                    |
|-------------|------------|------------------------|-----------|--------------------------------|
|             | Unscaled   | Scaled (factor 0.9803) |           |                                |
| 187         | 1474.81    | 1445.75                | 10.7851   | N-Me wag                       |
| 188         | 1474.82    | 1445.77                | 10.5045   | N-Me wag                       |
| 190         | 1479.26    | 1450.11                | 30.9619   | Pyridinium breathing           |
| 193         | 1479.53    | 1450.39                | 33.148    | Pyridinium breathing           |
| 198         | 1509.17    | 1479.44                | 37.2551   | N-Me rock                      |
| 199         | 1509.18    | 1479.45                | 55.3931   | N-Me rock                      |
| 200         | 1509.24    | 1479.5                 | 18.7789   | N-Me rock                      |
| 201         | 1512.95    | 1483.15                | 46.8093   | N-Me rock                      |
| 203         | 1513.72    | 1483.9                 | 48.3441   | N-Me rock                      |
| 204         | 1514.47    | 1484.64                | 14.6004   | N-Me rock                      |
| 206         | 1547.33    | 1516.85                | 65.7881   | Pyridinium breathing           |
| 207         | 1547.35    | 1516.87                | 69.1859   | Pyridinium breathing           |
| 212         | 1574.16    | 1543.15                | 19.1395   | Pyridinium-Porphyrin breathing |
| 213         | 1574.48    | 1543.46                | 30.4477   | Pyridinium-Porphyrin breathing |
| 214         | 1582.1     | 1550.93                | 31.9652   | Pyridinium breathing           |
| 215         | 1585.68    | 1554.44                | 17.5111   | Pyridinium-Porphyrin breathing |
| 216         | 1585.76    | 1554.52                | 14.5934   | Pyridinium-Porphyrin breathing |
| 217         | 1589.3     | 1557.99                | 10.7115   | Pyridinium-Porphyrin breathing |
| 218         | 1595.07    | 1563.65                | 67.4966   | Porphyrin breathing            |
| 219         | 1595.18    | 1563.75                | 67.4399   | Porphyrin breathing            |
| 223         | 1670.81    | 1637.89                | 536.5935  | Pyridinium breathing           |
| 224         | 1670.83    | 1637.92                | 541.3722  | Pyridinium breathing           |

**Table S3** Table of structural parameters for optimised PtTMPyP4 including atom numbering used

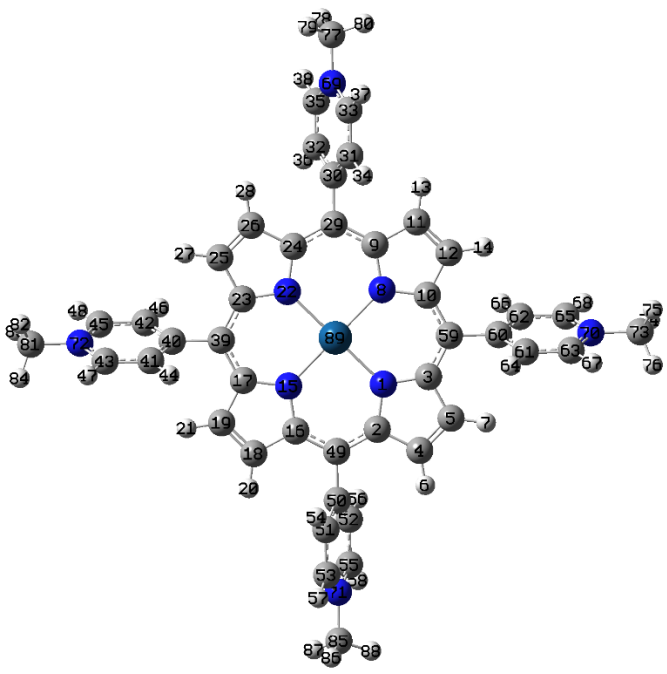

| Atom Numbering |        |
|----------------|--------|
| Parameter      | Value  |
| R(1,2)         | 1.3962 |
| R(1,3)         | 1.3963 |
| R(2,4)         | 1.4545 |
| R(2,49)        | 1.4063 |
| R(3,5)         | 1.4545 |
| R(3,59)        | 1.4061 |
| R(4,5)         | 1.368  |
| R(4,6)         | 1.0794 |
| R(5,7)         | 1.0794 |
| R(8,9)         | 1.3962 |
| R(8,10)        | 1.3964 |
| R(8,89)        | 2.0458 |
| R(9,11)        | 1.4545 |
| R(9,29)        | 1.4063 |
| R(10,12)       | 1.4545 |
| R(10,59)       | 1.4061 |
| R(11,12)       | 1.368  |
| R(11,13)       | 1.0794 |
| R(12,14)       | 1.0794 |
| R(15,16)       | 1.3965 |
| R(15,17)       | 1.3963 |

|          |        |
|----------|--------|
| R(15,89) | 2.0459 |
| R(16,18) | 1.4546 |
| R(16,49) | 1.4061 |
| R(17,19) | 1.4546 |
| R(17,39) | 1.4064 |
| R(18,19) | 1.368  |
| R(18,20) | 1.0794 |
| R(19,21) | 1.0795 |
| R(22,23) | 1.3963 |
| R(22,24) | 1.3965 |
| R(23,25) | 1.4547 |
| R(23,39) | 1.4064 |
| R(24,26) | 1.4546 |
| R(24,29) | 1.4061 |
| R(25,26) | 1.368  |
| R(25,27) | 1.0794 |
| R(26,28) | 1.0795 |
| R(29,30) | 1.5037 |
| R(30,31) | 1.4168 |
| R(30,32) | 1.4147 |
| R(31,33) | 1.3951 |
| R(31,34) | 1.0844 |
| R(32,35) | 1.3975 |
| R(32,36) | 1.0844 |
| R(33,37) | 1.0842 |
| R(33,69) | 1.3692 |
| R(35,38) | 1.0836 |
| R(35,69) | 1.3671 |
| R(39,40) | 1.5033 |
| R(40,41) | 1.417  |
| R(40,42) | 1.4148 |
| R(41,43) | 1.3949 |
| R(41,44) | 1.0844 |
| R(42,45) | 1.3974 |
| R(42,46) | 1.0844 |
| R(43,47) | 1.0842 |
| R(43,72) | 1.3692 |
| R(45,48) | 1.0836 |
| R(45,72) | 1.367  |
| R(49,50) | 1.5037 |
| R(50,51) | 1.4146 |
| R(50,52) | 1.4169 |
| R(51,53) | 1.3976 |
| R(51,54) | 1.0844 |
| R(52,55) | 1.395  |
| R(52,56) | 1.0844 |

|           |          |
|-----------|----------|
| R(53,57)  | 1.0836   |
| R(53,71)  | 1.367    |
| R(55,58)  | 1.0843   |
| R(55,71)  | 1.3692   |
| R(59,60)  | 1.5039   |
| R(60,61)  | 1.4168   |
| R(60,62)  | 1.4147   |
| R(61,63)  | 1.3951   |
| R(61,64)  | 1.0845   |
| R(62,65)  | 1.3975   |
| R(62,66)  | 1.0844   |
| R(63,67)  | 1.0843   |
| R(63,70)  | 1.3692   |
| R(65,68)  | 1.0836   |
| R(65,70)  | 1.367    |
| R(69,77)  | 1.5041   |
| R(70,73)  | 1.5041   |
| R(71,85)  | 1.5041   |
| R(72,81)  | 1.5041   |
| R(73,74)  | 1.091    |
| R(73,75)  | 1.0936   |
| R(73,76)  | 1.093    |
| R(77,78)  | 1.091    |
| R(77,79)  | 1.0937   |
| R(77,80)  | 1.0929   |
| R(81,82)  | 1.0936   |
| R(81,83)  | 1.091    |
| R(81,84)  | 1.0931   |
| R(85,86)  | 1.091    |
| R(85,87)  | 1.0936   |
| R(85,88)  | 1.0931   |
| A(2,1,3)  | 106.6405 |
| A(1,2,4)  | 109.2453 |
| A(1,2,49) | 126.0645 |
| A(4,2,49) | 124.6795 |
| A(1,3,5)  | 109.2443 |
| A(1,3,59) | 126.0483 |
| A(5,3,59) | 124.6811 |
| A(2,4,5)  | 107.4344 |
| A(2,4,6)  | 125.8277 |
| A(5,4,6)  | 126.7352 |
| A(3,5,4)  | 107.4329 |
| A(3,5,7)  | 125.8349 |
| A(4,5,7)  | 126.7296 |
| A(9,8,10) | 106.6403 |
| A(9,8,89) | 126.6725 |

|             |          |
|-------------|----------|
| A(10,8,89)  | 126.6867 |
| A(8,9,11)   | 109.2463 |
| A(8,9,29)   | 126.0617 |
| A(11,9,29)  | 124.6819 |
| A(8,10,12)  | 109.2411 |
| A(8,10,59)  | 126.0431 |
| A(12,10,59) | 124.6914 |
| A(9,11,12)  | 107.4356 |
| A(9,11,13)  | 125.8304 |
| A(12,11,13) | 126.7312 |
| A(10,12,11) | 107.434  |
| A(10,12,14) | 125.8326 |
| A(11,12,14) | 126.7312 |
| A(16,15,17) | 106.6419 |
| A(16,15,89) | 126.6598 |
| A(17,15,89) | 126.6703 |
| A(15,16,18) | 109.2392 |
| A(15,16,49) | 126.0649 |
| A(18,16,49) | 124.6726 |
| A(15,17,19) | 109.2386 |
| A(15,17,39) | 126.0815 |
| A(19,17,39) | 124.6545 |
| A(16,18,19) | 107.4333 |
| A(16,18,20) | 125.8145 |
| A(19,18,20) | 126.7319 |
| A(17,19,18) | 107.4393 |
| A(17,19,21) | 125.8131 |
| A(18,19,21) | 126.7242 |
| A(23,22,24) | 106.6421 |
| A(22,23,25) | 109.2365 |
| A(22,23,39) | 126.0684 |
| A(25,23,39) | 124.6716 |
| A(22,24,26) | 109.2396 |
| A(22,24,29) | 126.0727 |
| A(26,24,29) | 124.6637 |
| A(23,25,26) | 107.4393 |
| A(23,25,27) | 125.813  |
| A(26,25,27) | 126.7257 |
| A(24,26,25) | 107.4348 |
| A(24,26,28) | 125.8123 |
| A(25,26,28) | 126.7326 |
| A(9,29,24)  | 124.5158 |
| A(9,29,30)  | 117.7526 |
| A(24,29,30) | 117.7313 |
| A(29,30,31) | 121.3096 |
| A(29,30,32) | 121.44   |



|             |          |
|-------------|----------|
| A(31,30,32) | 117.2503 |
| A(30,31,33) | 120.415  |
| A(30,31,34) | 120.962  |
| A(33,31,34) | 118.6147 |
| A(30,32,35) | 120.4541 |
| A(30,32,36) | 120.987  |
| A(35,32,36) | 118.5488 |
| A(31,33,37) | 122.2724 |
| A(31,33,69) | 120.8788 |
| A(37,33,69) | 116.8477 |
| A(32,35,38) | 122.0877 |
| A(32,35,69) | 120.8272 |
| A(38,35,69) | 117.0843 |
| A(17,39,23) | 124.49   |
| A(17,39,40) | 117.7425 |
| A(23,39,40) | 117.7675 |
| A(39,40,41) | 121.3579 |
| A(39,40,42) | 121.4176 |
| A(41,40,42) | 117.2245 |
| A(40,41,43) | 120.426  |
| A(40,41,44) | 120.95   |
| A(43,41,44) | 118.6147 |
| A(40,42,45) | 120.4689 |
| A(40,42,46) | 120.9855 |
| A(45,42,46) | 118.5345 |
| A(41,43,47) | 122.281  |
| A(41,43,72) | 120.8864 |
| A(47,43,72) | 116.8315 |
| A(42,45,48) | 122.0799 |
| A(42,45,72) | 120.8282 |
| A(48,45,72) | 117.091  |
| A(2,49,16)  | 124.5135 |
| A(2,49,50)  | 117.7412 |
| A(16,49,50) | 117.7449 |
| A(49,50,51) | 121.466  |
| A(49,50,52) | 121.283  |
| A(51,50,52) | 117.251  |
| A(50,51,53) | 120.4537 |
| A(50,51,54) | 120.9929 |
| A(53,51,54) | 118.5438 |
| A(50,52,55) | 120.414  |
| A(50,52,56) | 120.9565 |
| A(55,52,56) | 118.6208 |
| A(51,53,57) | 122.0815 |
| A(51,53,71) | 120.8258 |
| A(57,53,71) | 117.092  |

|             |          |
|-------------|----------|
| A(52,55,58) | 122.2831 |
| A(52,55,71) | 120.8796 |
| A(58,55,71) | 116.8363 |
| A(3,59,10)  | 124.5205 |
| A(3,59,60)  | 117.7348 |
| A(10,59,60) | 117.7447 |
| A(59,60,61) | 121.3433 |
| A(59,60,62) | 121.3895 |
| A(61,60,62) | 117.2672 |
| A(60,61,63) | 120.4028 |
| A(60,61,64) | 120.966  |
| A(63,61,64) | 118.6235 |
| A(60,62,65) | 120.4468 |
| A(60,62,66) | 120.9969 |
| A(65,62,66) | 118.547  |
| A(61,63,67) | 122.2781 |
| A(61,63,70) | 120.8808 |
| A(67,63,70) | 116.8401 |
| A(62,65,68) | 122.0819 |
| A(62,65,70) | 120.8225 |
| A(68,65,70) | 117.0948 |
| A(33,69,35) | 120.1723 |
| A(33,69,77) | 119.2216 |
| A(35,69,77) | 120.6028 |
| A(63,70,65) | 120.1779 |
| A(63,70,73) | 119.1876 |
| A(65,70,73) | 120.6328 |
| A(53,71,55) | 120.1737 |
| A(53,71,85) | 120.659  |
| A(55,71,85) | 119.1664 |
| A(43,72,45) | 120.1634 |
| A(43,72,81) | 119.1828 |
| A(45,72,81) | 120.6526 |
| A(70,73,74) | 109.4638 |
| A(70,73,75) | 109.3592 |
| A(70,73,76) | 109.3701 |
| A(74,73,75) | 109.4275 |
| A(74,73,76) | 109.1832 |
| A(75,73,76) | 110.0226 |
| A(69,77,78) | 109.46   |
| A(69,77,79) | 109.3621 |
| A(69,77,80) | 109.3699 |
| A(78,77,79) | 109.4749 |
| A(78,77,80) | 109.1459 |
| A(79,77,80) | 110.0137 |
| A(72,81,82) | 109.3591 |

|             |          |
|-------------|----------|
| A(72,81,83) | 109.4661 |
| A(72,81,84) | 109.3722 |
| A(82,81,83) | 109.4079 |
| A(82,81,84) | 110.0286 |
| A(83,81,84) | 109.1926 |
| A(71,85,86) | 109.4685 |
| A(71,85,87) | 109.3549 |
| A(71,85,88) | 109.3703 |
| A(86,85,87) | 109.3939 |
| A(86,85,88) | 109.2105 |
| A(87,85,88) | 110.0284 |

**Table S4** Coordinates of the optimised ground state of PtTMPyP4 in water

| Tag | Symbol | X        | Y        | Z        |
|-----|--------|----------|----------|----------|
| 1   | N      | -0.00625 | -0.01117 | -0.00171 |
| 2   | C      | -0.02231 | -0.01058 | 1.394431 |
| 3   | C      | 1.336119 | -0.0096  | -0.38616 |
| 4   | C      | 1.345244 | 0.000776 | 1.889613 |
| 5   | C      | 2.175056 | -0.0052  | 0.801989 |
| 6   | H      | 1.641294 | 0.020593 | 2.92747  |
| 7   | H      | 3.254377 | -0.01487 | 0.81354  |
| 8   | N      | -0.39192 | -0.05492 | -2.86838 |
| 9   | C      | -0.77615 | -0.05498 | -4.21069 |
| 10  | C      | 1.004227 | -0.07665 | -2.85208 |
| 11  | C      | 0.411745 | -0.08675 | -5.04942 |
| 12  | C      | 1.499354 | -0.09315 | -4.21965 |
| 13  | H      | 0.422884 | -0.11101 | -6.12853 |
| 14  | H      | 2.537296 | -0.10004 | -4.51587 |
| 15  | N      | -2.87351 | 0.024501 | 0.383877 |
| 16  | C      | -2.489   | 0.020168 | 1.726358 |
| 17  | C      | -4.26967 | 0.023412 | 0.367803 |
| 18  | C      | -3.67709 | -0.00464 | 2.565134 |
| 19  | C      | -4.76473 | -0.0021  | 1.735358 |
| 20  | H      | -3.68807 | -0.04552 | 3.643753 |
| 21  | H      | -5.80218 | -0.0417  | 2.030912 |
| 22  | N      | -3.25958 | -0.04407 | -2.48287 |
| 23  | C      | -4.60179 | -0.01875 | -2.09883 |
| 24  | C      | -3.2431  | -0.04583 | -3.87923 |
| 25  | C      | -5.43979 | 0.016089 | -3.28737 |
| 26  | C      | -4.60989 | -0.00018 | -4.37476 |
| 27  | H      | -6.51764 | 0.07338  | -3.29879 |
| 28  | H      | -4.9045  | 0.041042 | -5.41242 |
| 29  | C      | -2.09687 | -0.05101 | -4.6937  |
| 30  | C      | -2.29742 | -0.04746 | -6.18399 |
| 31  | C      | -1.95374 | 1.079802 | -6.97046 |

|    |   |          |          |          |
|----|---|----------|----------|----------|
| 32 | C | -2.83734 | -1.16765 | -6.85858 |
| 33 | C | -2.15206 | 1.064576 | -8.35129 |
| 34 | H | -1.54864 | 1.976113 | -6.51381 |
| 35 | C | -3.01068 | -1.14369 | -8.24505 |
| 36 | H | -3.10771 | -2.06795 | -6.31799 |
| 37 | H | -1.91223 | 1.91473  | -8.98001 |
| 38 | H | -3.40995 | -1.99095 | -8.78997 |
| 39 | C | -5.08483 | 0.008424 | -0.77823 |
| 40 | C | -6.57459 | 0.022876 | -0.57756 |
| 41 | C | -7.23537 | 1.155623 | -0.04086 |
| 42 | C | -7.37522 | -1.09344 | -0.91604 |
| 43 | C | -8.61937 | 1.149417 | 0.133355 |
| 44 | H | -6.68239 | 2.049571 | 0.225615 |
| 45 | C | -8.75784 | -1.06065 | -0.71573 |
| 46 | H | -6.93117 | -1.998   | -1.3166  |
| 47 | H | -9.15712 | 2.004057 | 0.52831  |
| 48 | H | -9.39391 | -1.9052  | -0.95301 |
| 49 | C | -1.16845 | 0.003299 | 2.209164 |
| 50 | C | -0.96801 | -0.00543 | 3.699449 |
| 51 | C | -1.29219 | 1.118665 | 4.494717 |
| 52 | C | -0.44695 | -1.14256 | 4.365101 |
| 53 | C | -1.09355 | 1.088889 | 5.877784 |
| 54 | H | -1.68136 | 2.026187 | 4.04656  |
| 55 | C | -0.27335 | -1.13275 | 5.749194 |
| 56 | H | -0.1917  | -2.04215 | 3.815922 |
| 57 | H | -1.32072 | 1.938899 | 6.510268 |
| 58 | H | 0.110401 | -1.99009 | 6.290796 |
| 59 | C | 1.81882  | -0.04762 | -1.70631 |
| 60 | C | 3.309296 | -0.05773 | -1.90652 |
| 61 | C | 4.100506 | 1.07934  | -1.6094  |
| 62 | C | 3.978867 | -1.20253 | -2.39886 |
| 63 | C | 5.481336 | 1.049577 | -1.80604 |
| 64 | H | 3.647717 | 1.99353  | -1.24157 |
| 65 | C | 5.3655   | -1.19187 | -2.57272 |
| 66 | H | 3.434305 | -2.11082 | -2.63214 |
| 67 | H | 6.114042 | 1.905789 | -1.60063 |
| 68 | H | 5.906595 | -2.05734 | -2.93657 |
| 69 | N | -2.67221 | -0.03807 | -8.97437 |
| 70 | N | 6.099572 | -0.07642 | -2.27999 |
| 71 | N | -0.59261 | -0.02614 | 6.489659 |
| 72 | N | -9.3648  | 0.050256 | -0.19974 |
| 73 | C | 7.58987  | -0.0646  | -2.48316 |
| 74 | H | 7.926935 | -1.06454 | -2.76023 |
| 75 | H | 7.841244 | 0.638433 | -3.28228 |
| 76 | H | 8.080139 | 0.234871 | -1.55332 |
| 77 | C | -2.87889 | -0.01062 | -10.464  |
| 78 | H | -3.15745 | -1.00687 | -10.8107 |
| 79 | H | -3.67747 | 0.696334 | -10.7063 |

|    |    |          |          |          |
|----|----|----------|----------|----------|
| 80 | H  | -1.94985 | 0.292445 | -10.9533 |
| 81 | C  | -10.8549 | 0.086424 | 0.001089 |
| 82 | H  | -11.2922 | 0.837028 | -0.66328 |
| 83 | H  | -11.2769 | -0.89261 | -0.23061 |
| 84 | H  | -11.0745 | 0.334987 | 1.042624 |
| 85 | C  | -0.39221 | -0.05857 | 7.980004 |
| 86 | H  | -0.62487 | 0.92125  | 8.399574 |
| 87 | H  | -1.05631 | -0.80846 | 8.418759 |
| 88 | H  | 0.649423 | -0.3061  | 8.200454 |
| 89 | Pt | -1.63283 | -0.02133 | -1.24228 |

---

**Table S5** Coordinates of optimised ground state of D<sub>2</sub>TMPyP4 in water

| Tag | Symbol | X         | Y         | Z         |
|-----|--------|-----------|-----------|-----------|
| 1   | N      | -1.994727 | 0.558958  | -0.052028 |
| 2   | C      | -3.122114 | -0.263493 | -0.094105 |
| 3   | C      | -2.485479 | 1.861694  | -0.121141 |
| 4   | C      | -4.334265 | 0.540651  | -0.231526 |
| 5   | C      | -3.941445 | 1.856758  | -0.232536 |
| 6   | H      | -5.342459 | 0.168962  | -0.330565 |
| 7   | H      | -4.583363 | 2.7218    | -0.300328 |
| 8   | N      | 0.605552  | 2.034114  | -0.001966 |
| 9   | C      | 1.914848  | 2.495219  | 0.040785  |
| 10  | C      | -0.284793 | 3.107404  | 0.05924   |
| 11  | C      | 1.847233  | 3.934617  | 0.17336   |
| 12  | C      | 0.517093  | 4.305377  | 0.165399  |
| 13  | H      | 2.691665  | 4.597243  | 0.271872  |
| 14  | H      | 0.134941  | 5.312384  | 0.224281  |
| 15  | N      | -0.616223 | -2.039133 | -0.096219 |
| 16  | C      | -1.924647 | -2.488208 | 0.028555  |
| 17  | C      | 0.272463  | -3.10923  | 0.015297  |
| 18  | C      | -1.857438 | -3.913735 | 0.262743  |
| 19  | C      | -0.528245 | -4.288931 | 0.253266  |
| 20  | H      | -2.700849 | -4.558761 | 0.450521  |
| 21  | H      | -0.144243 | -5.280979 | 0.432023  |
| 22  | N      | 1.984681  | -0.559442 | 0.00306   |
| 23  | C      | 2.469655  | -1.856989 | -0.145908 |
| 24  | C      | 3.101857  | 0.26887   | -0.122562 |
| 25  | C      | 3.90356   | -1.841083 | -0.418065 |
| 26  | C      | 4.295426  | -0.524066 | -0.403733 |
| 27  | H      | 4.523301  | -2.698594 | -0.632288 |
| 28  | H      | 5.284154  | -0.140986 | -0.605675 |
| 29  | C      | 3.085741  | 1.694252  | -0.026796 |
| 30  | C      | 4.39378   | 2.398442  | 0.000224  |
| 31  | C      | 4.705627  | 3.442225  | -0.910884 |
| 32  | C      | 5.391822  | 2.048434  | 0.945436  |
| 33  | C      | 5.936224  | 4.084491  | -0.85202  |
| 34  | H      | 4.008243  | 3.73725   | -1.685245 |
| 35  | C      | 6.604403  | 2.729415  | 0.97813   |
| 36  | H      | 5.218026  | 1.270479  | 1.678581  |
| 37  | H      | 6.207217  | 4.873837  | -1.541415 |
| 38  | H      | 7.372325  | 2.50026   | 1.704761  |
| 39  | C      | 1.682235  | -3.047755 | -0.056346 |
| 40  | C      | 2.412914  | -4.348468 | -0.035977 |
| 41  | C      | 2.139122  | -5.365745 | -0.983997 |
| 42  | C      | 3.415655  | -4.609904 | 0.928325  |
| 43  | C      | 2.846521  | -6.563506 | -0.952171 |
| 44  | H      | 1.400737  | -5.222137 | -1.763226 |
| 45  | C      | 4.089743  | -5.828969 | 0.92975   |
| 46  | H      | 3.662781  | -3.881879 | 1.691015  |
| 47  | H      | 2.674695  | -7.354955 | -1.670108 |
| 48  | H      | 4.851489  | -6.063269 | 1.661259  |
| 49  | C      | -3.098227 | -1.688602 | -0.012638 |

|    |   |           |           |           |
|----|---|-----------|-----------|-----------|
| 50 | C | -4.398456 | -2.407014 | 0.049484  |
| 51 | C | -4.71625  | -3.44007  | -0.868395 |
| 52 | C | -5.375255 | -2.089149 | 1.029469  |
| 53 | C | -5.940423 | -4.098332 | -0.794745 |
| 54 | H | -4.030402 | -3.716968 | -1.659721 |
| 55 | C | -6.578124 | -2.782746 | 1.074877  |
| 56 | H | -5.190992 | -1.326183 | 1.775642  |
| 57 | H | -6.215225 | -4.878824 | -1.491924 |
| 58 | H | -7.334801 | -2.580368 | 1.821884  |
| 59 | C | -1.690567 | 3.04271   | -0.030299 |
| 60 | C | -2.416164 | 4.353444  | -0.030381 |
| 61 | C | -3.101167 | 4.808286  | -1.18149  |
| 62 | C | -2.441223 | 5.175583  | 1.117885  |
| 63 | C | -3.7651   | 6.031494  | -1.160729 |
| 64 | H | -3.106939 | 4.228249  | -2.096225 |
| 65 | C | -3.127021 | 6.390201  | 1.095353  |
| 66 | H | -1.949446 | 4.874619  | 2.034907  |
| 67 | H | -4.291714 | 6.418414  | -2.023405 |
| 68 | H | -3.174176 | 7.038868  | 1.959852  |
| 69 | N | 6.86865   | 3.735442  | 0.088354  |
| 70 | N | -3.77413  | 6.804796  | -0.032398 |
| 71 | N | -6.853977 | -3.77308  | 0.168866  |
| 72 | N | 3.807094  | -6.785986 | -0.004526 |
| 73 | C | -4.507948 | 8.107739  | -0.052584 |
| 74 | H | -4.427984 | 8.580879  | 0.925875  |
| 75 | H | -4.065827 | 8.757209  | -0.811609 |
| 76 | H | -5.559022 | 7.923532  | -0.284646 |
| 77 | C | 8.167676  | 4.470437  | 0.132838  |
| 78 | H | 8.756079  | 4.110934  | 0.976872  |
| 79 | H | 8.716504  | 4.294389  | -0.795391 |
| 80 | H | 7.97251   | 5.538697  | 0.252396  |
| 81 | C | 4.550973  | -8.08216  | -0.014184 |
| 82 | H | 5.052905  | -8.199345 | -0.977313 |
| 83 | H | 5.291782  | -8.077745 | 0.78525   |
| 84 | H | 3.847614  | -8.902824 | 0.143235  |
| 85 | C | -8.160328 | -4.490967 | 0.252551  |
| 86 | H | -8.197731 | -5.262196 | -0.516964 |
| 87 | H | -8.254084 | -4.954073 | 1.237563  |
| 88 | H | -8.974878 | -3.779626 | 0.096889  |
| 89 | H | 0.34087   | 1.052761  | -0.048856 |
| 90 | H | -0.351498 | -1.062472 | -0.20033  |

---

**Table S6** Coordinates of the optimised first singlet excited state of D<sub>2</sub>TMPyP4 in water

| Tag | Symbol | X         | Y         | Z         |
|-----|--------|-----------|-----------|-----------|
| 1   | N      | -1.994727 | 0.558958  | -0.052028 |
| 2   | C      | -3.122114 | -0.263493 | -0.094105 |
| 3   | C      | -2.485479 | 1.861694  | -0.121141 |
| 4   | C      | -4.334265 | 0.540651  | -0.231526 |
| 5   | C      | -3.941445 | 1.856758  | -0.232536 |
| 6   | H      | -5.342459 | 0.168962  | -0.330565 |
| 7   | H      | -4.583363 | 2.7218    | -0.300328 |
| 8   | N      | 0.605552  | 2.034114  | -0.001966 |
| 9   | C      | 1.914848  | 2.495219  | 0.040785  |
| 10  | C      | -0.284793 | 3.107404  | 0.05924   |
| 11  | C      | 1.847233  | 3.934617  | 0.17336   |
| 12  | C      | 0.517093  | 4.305377  | 0.165399  |
| 13  | H      | 2.691665  | 4.597243  | 0.271872  |
| 14  | H      | 0.134941  | 5.312384  | 0.224281  |
| 15  | N      | -0.616223 | -2.039133 | -0.096219 |
| 16  | C      | -1.924647 | -2.488208 | 0.028555  |
| 17  | C      | 0.272463  | -3.10923  | 0.015297  |
| 18  | C      | -1.857438 | -3.913735 | 0.262743  |
| 19  | C      | -0.528245 | -4.288931 | 0.253266  |
| 20  | H      | -2.700849 | -4.558761 | 0.450521  |
| 21  | H      | -0.144243 | -5.280979 | 0.432023  |
| 22  | N      | 1.984681  | -0.559442 | 0.00306   |
| 23  | C      | 2.469655  | -1.856989 | -0.145908 |
| 24  | C      | 3.101857  | 0.26887   | -0.122562 |
| 25  | C      | 3.90356   | -1.841083 | -0.418065 |
| 26  | C      | 4.295426  | -0.524066 | -0.403733 |
| 27  | H      | 4.523301  | -2.698594 | -0.632288 |
| 28  | H      | 5.284154  | -0.140986 | -0.605675 |
| 29  | C      | 3.085741  | 1.694252  | -0.026796 |
| 30  | C      | 4.39378   | 2.398442  | 0.000224  |
| 31  | C      | 4.705627  | 3.442225  | -0.910884 |
| 32  | C      | 5.391822  | 2.048434  | 0.945436  |
| 33  | C      | 5.936224  | 4.084491  | -0.85202  |
| 34  | H      | 4.008243  | 3.73725   | -1.685245 |
| 35  | C      | 6.604403  | 2.729415  | 0.97813   |
| 36  | H      | 5.218026  | 1.270479  | 1.678581  |
| 37  | H      | 6.207217  | 4.873837  | -1.541415 |
| 38  | H      | 7.372325  | 2.50026   | 1.704761  |
| 39  | C      | 1.682235  | -3.047755 | -0.056346 |
| 40  | C      | 2.412914  | -4.348468 | -0.035977 |
| 41  | C      | 2.139122  | -5.365745 | -0.983997 |
| 42  | C      | 3.415655  | -4.609904 | 0.928325  |
| 43  | C      | 2.846521  | -6.563506 | -0.952171 |
| 44  | H      | 1.400737  | -5.222137 | -1.763226 |
| 45  | C      | 4.089743  | -5.828969 | 0.92975   |
| 46  | H      | 3.662781  | -3.881879 | 1.691015  |
| 47  | H      | 2.674695  | -7.354955 | -1.670108 |
| 48  | H      | 4.851489  | -6.063269 | 1.661259  |
| 49  | C      | -3.098227 | -1.688602 | -0.012638 |



|    |   |           |           |           |
|----|---|-----------|-----------|-----------|
| 50 | C | -4.398456 | -2.407014 | 0.049484  |
| 51 | C | -4.71625  | -3.44007  | -0.868395 |
| 52 | C | -5.375255 | -2.089149 | 1.029469  |
| 53 | C | -5.940423 | -4.098332 | -0.794745 |
| 54 | H | -4.030402 | -3.716968 | -1.659721 |
| 55 | C | -6.578124 | -2.782746 | 1.074877  |
| 56 | H | -5.190992 | -1.326183 | 1.775642  |
| 57 | H | -6.215225 | -4.878824 | -1.491924 |
| 58 | H | -7.334801 | -2.580368 | 1.821884  |
| 59 | C | -1.690567 | 3.04271   | -0.030299 |
| 60 | C | -2.416164 | 4.353444  | -0.030381 |
| 61 | C | -3.101167 | 4.808286  | -1.18149  |
| 62 | C | -2.441223 | 5.175583  | 1.117885  |
| 63 | C | -3.7651   | 6.031494  | -1.160729 |
| 64 | H | -3.106939 | 4.228249  | -2.096225 |
| 65 | C | -3.127021 | 6.390201  | 1.095353  |
| 66 | H | -1.949446 | 4.874619  | 2.034907  |
| 67 | H | -4.291714 | 6.418414  | -2.023405 |
| 68 | H | -3.174176 | 7.038868  | 1.959852  |
| 69 | N | 6.86865   | 3.735442  | 0.088354  |
| 70 | N | -3.77413  | 6.804796  | -0.032398 |
| 71 | N | -6.853977 | -3.77308  | 0.168866  |
| 72 | N | 3.807094  | -6.785986 | -0.004526 |
| 73 | C | -4.507948 | 8.107739  | -0.052584 |
| 74 | H | -4.427984 | 8.580879  | 0.925875  |
| 75 | H | -4.065827 | 8.757209  | -0.811609 |
| 76 | H | -5.559022 | 7.923532  | -0.284646 |
| 77 | C | 8.167676  | 4.470437  | 0.132838  |
| 78 | H | 8.756079  | 4.110934  | 0.976872  |
| 79 | H | 8.716504  | 4.294389  | -0.795391 |
| 80 | H | 7.97251   | 5.538697  | 0.252396  |
| 81 | C | 4.550973  | -8.08216  | -0.014184 |
| 82 | H | 5.052905  | -8.199345 | -0.977313 |
| 83 | H | 5.291782  | -8.077745 | 0.78525   |
| 84 | H | 3.847614  | -8.902824 | 0.143235  |
| 85 | C | -8.160328 | -4.490967 | 0.252551  |
| 86 | H | -8.197731 | -5.262196 | -0.516964 |
| 87 | H | -8.254084 | -4.954073 | 1.237563  |
| 88 | H | -8.974878 | -3.779626 | 0.096889  |
| 89 | D | 0.34087   | 1.052761  | -0.048856 |
| 90 | D | -0.351498 | -1.062472 | -0.20033  |

---

**Table S7** TRIR kinetic fits – TMPyP4 + GMP/{d(GC)<sub>5</sub>}<sub>2</sub>

|                                                                    | $\tau$ (ns) monoexp. fit after 50 ps |
|--------------------------------------------------------------------|--------------------------------------|
| TMPyP4-GMP (1636 cm <sup>-1</sup> )                                | 0.61 ± 0.04                          |
| TMPyP4-GMP (1646 cm <sup>-1</sup> )                                | 0.71 ± 0.11                          |
| TMPyP4-{d(GC) <sub>5</sub> } <sub>2</sub> (1636 cm <sup>-1</sup> ) | 2.7 ± 0.4                            |
| TMPyP4-{d(GC) <sub>5</sub> } <sub>2</sub> (1646 cm <sup>-1</sup> ) | 2.4 ± 0.6                            |
| TMPyP4-cMYC (1631 cm <sup>-1</sup> )                               | 1.9 ± 0.3                            |

**Table S8** Biexponential fits to ps-TA data TMPyP4-GMP

| system      | Wavelength (nm) | $\tau_1$ (ps) | $\tau_2$ (ps)  |
|-------------|-----------------|---------------|----------------|
| TMPyP4- GMP | 460 (transient) | 51 ± 16 (12%) | 540 ± 30 (88%) |
| TMPyP4- GMP | 431 (bleach)    | 55 ± 9 (17%)  | 548 ± 23 (83%) |

## Experimental

### Solution sample preparation

Solution samples for transient spectroscopy measurements were prepared in 50 mM phosphate buffered (pH 7) D<sub>2</sub>O and a known volume of solution (25–35  $\mu$ L) was dropped between two CaF<sub>2</sub> (25 mm diameter, 2 mm thick) windows (Crystran Ltd, UK), separated by a Teflon spacer of 50  $\mu$ m pathlength, in a demountable solution IR cell (Harrick Scientific Products Inc., New York).

### Computational methods

All quantum chemical calculations were performed using Gaussian 16, Revision B.01<sup>1</sup>. The hybrid density function B3LYP was used in the majority of calculations.<sup>2,3</sup> All calculations used the double zeta quality LanL2DZ basis set.<sup>4-6</sup> Structures were optimised to tight convergence criteria with the exception that the pyridinium methyl groups were frozen in the latter stages of the optimisations. The nature and energy of excited states were calculated using Time-Dependent Density Functional Theory methods (TD-DFT).<sup>7-12</sup> All calculations were corrected for water using the Polarizable Continuum Model (PCM).<sup>13,14</sup> A scaling factor of 0.9803 was applied for all calculated wavenumbers to model the experimental spectra.

### Cell culture

HeLa (human cervical cancer) cells were grown in Dulbecco's Modified Eagle Medium (DMEM) (Glutamax) supplemented with 10% fetal bovine serum and 50  $\mu$ g/ml penicillin/streptomycin at 37 °C in a humidified atmosphere of 5% CO<sub>2</sub>.

### Confocal microscopy

Cells were seeded at a density of  $1 \times 10^5$  cells/dish in glass bottom wells and treated as indicated. Cells were viewed with a Leica confocal microscope and imaged with LAX software, 63X oil immersion lens. Compounds were excited by a 405 nm laser, emission 600–700 nm. Live cells were imaged directly, fixed cells were rinsed twice with PBS and incubated at -20 °C in methanol for 20 min, rinsed again and imaged in dH<sub>2</sub>O.

### Transient visible absorption measurement

Ps-TA measurements were performed on the ULTRA<sup>15</sup> apparatus at the Central Laser Facility (STFC Rutherford Appleton Laboratories, Harwell, UK). Part of the Ti:Sapphire laser output beam was used to generate a white light continuum (WLC) probe in a CaF<sub>2</sub> plate. The crystal plate was continuously rastered to avoid colour centre formation and to improve pulse-to-pulse stability in the probe. After the sample the WLC was dispersed through the grating monochromator and detected using a linear silicon array (Quantum Detectors). In front of the monochromator, a 400 nm notch filter was placed in order to remove scatter from the excitation beam. The polarisation of the pump pulses at the sample was at the magic angle relative to the probe, with an energy of 1  $\mu$ J and a spot size ca. 100–150  $\mu$ m. The spectra were calibrated using a WCT-2065 metal oxide filter. The laser beam was mechanically chopped before the sample at 5 kHz with a C-995 chopper from Terahertz Technologies Inc. Samples were raster scanned in the x and y directions to minimise photodamage and re-excitation effects. Samples were checked before and after the experiment by UV/vis spectroscopy.

### Time resolved infrared measurements of solution samples

The experiments were carried out in the Time Resolved Multiple Probe, TR<sup>MPS</sup>, mode of the ULTRA instrument.<sup>16</sup> The mid IR probe was generated by difference frequency conversion of the signal and idler from an optical parametric amplifier pumped by 4 W of the output of a 10 kHz, 8W, 40 fs, 800 nm titanium sapphire laser and the pump by second harmonic of a 1 kHz, 4W, 120 fs, 800 nm titanium sapphire laser. The 373 nm pump beam (pulse length ca. 50 fs) was provided by the OPA (TOPAS, Light Conversion) pumped with the fundamental beam of the 10 kHz titanium sapphire laser. By operating in TR<sup>MPS</sup> mode TRIR spectra spanning picosecond to microsecond timescales were produced. The

pump and probe beams were focused to approximately 150 and 100  $\mu\text{m}$  diameter in the sample and set to the magic angle. TR<sup>M</sup>PS data were acquired in sets of 10 probe pulses with the relative delay between pulses of the 1 and 10 kHz pulse trains controlled between 0 and 100  $\mu\text{s}$  with sub-ps accuracy using optical and electrical delays. The multiple probing accesses delay times,  $t$ ,  $t + 100 \mu\text{s}$ ,  $t + 200 \mu\text{s}$ , etc. up to  $t + 900 \mu\text{s}$ , for each pump–probe delay,  $t$ , thus ten probe measurements are made for each pump pulse. The last probe pulse in the set of ten is used as a background and subtracted from the first nine to create the difference spectra presented.

#### **Time resolved infrared measurements of cells**

HeLa cells were seeded at a density of  $6 \times 10^5$  cells/well in 6 well plates containing sterilised  $\text{CaF}_2$  discs and allowed to adhere overnight (or until nearly confluent). Cells were then rinsed and incubated in fresh phenol red-free FBS and antibiotic supplemented DMEM medium. Cells were treated with PtTMPyP4 (100  $\mu\text{M}$ ) for 4 h. Cells were then rinsed with phenol red-free medium and twice with phosphate-buffered saline, fixed for 20 min in methanol at  $-20^\circ\text{C}$ , washed with  $\text{dH}_2\text{O}$  and allowed to air-dry. (Fixation of cells using formaldehyde was also attempted, however this was found to result in strong back-ground TRIR signals). Two fixed samples, separated by a 25  $\mu\text{m}$  spacer, were then assembled into a demountable liquid cell and the TRIR spectra were recorded.

#### **TRIR measurements using LIFEtime apparatus**

TRIR measurements of the cells were carried out using the LIFEtime apparatus at the Central Laser Facility.<sup>17</sup> Briefly, a dual Pharos regenerative amplifier system (Light Conversion) was used to generate 1030 nm synchronised probe (100 kHz, 60  $\mu\text{J}$ , 180 fs) and pump (0.01-50 kHz, 150  $\mu\text{J}$ , 260 fs) pulses. The probe laser was used to drive two OPAs (Orpheus-ONE, Light Conversion), which generated tuneable mid-IR probe light via successive steps of optical parametric generation in BBO, KTA and difference frequency generation in GaSe. The two independently tuneable mid-IR probe beams were focussed through the sample with  $<70 \mu\text{m}$  spot sizes (FWHM) and dispersed onto two separate 128 pixel MCT array detectors (IR Associates). The second harmonic of the pump laser (515 nm) was used to pump a BBO-based OPA (Orpheus-HP, Light Conversion), generating 400 nm pump light from the second harmonic of the signal. The 400 nm pump light was delivered to the sample via a 1.2 m two-pass delay stage (Newport) and focussed through the sample with a spot size of 150  $\mu\text{m}$  FWHM. Pump-probe delays were set using a combination of the delay stage (0-16 ns) and seeding of the two regenerative amplifiers with different seed pulses from their common oscillator (giving delays in 12.5 ns out to 10 ms). Delays beyond 10  $\mu\text{s}$  could be achieved using the TR<sup>M</sup>PS method,<sup>16</sup> which is based on lowering the repetition rate of the pump and measuring each probe pulse in the pump period separately. In the cell experiments, the samples were observed to recover on a  $\mu\text{s}$  timescale, and so 50 kHz pumping in combination with rastering of the sample was used. The 400 nm pump energy was 200 nJ – 500 nJ. Lower repetition rates were used in solution experiments.

## **References**

1. M. J. Frisch, G. W. Trucks, H. B. Schlegel, G. E. Scuseria, M. A. Robb, J. R. Cheeseman, G. Scalmani, V. Barone, G. A. Petersson, H. Nakatsuji, X. Li, M. Caricato, A. V. Marenich, J. Bloino, B. G. Janesko, R. Gomperts, B. Mennucci, H. P. Hratchian, J. V. Ortiz, A. F. Izmaylov, J. L. Sonnenberg, D. Williams-Young, F. Ding, F. Lipparini, F. Egidi, J. Goings, B. Peng, A. Petrone, T. Henderson, D. Ranasinghe, V. G. Zakrzewski, J. Gao, N. Rega, G. Zheng, W. Liang, M. Hada, M. Ehara, K. Toyota, R. Fukuda, J. Hasegawa, M. Ishida, T. Nakajima, Y. Honda, O. Kitao, H. Nakai, T. Vreven, K. Throssell, J. A. Montgomery, J. E. Peralta, F. Ogliaro, M. J. Bearpark, J. J. Heyd, E. N. Brothers, K. N. Kudin, V. N. Staroverov, T. A. Keith, R. Kobayashi, J.

- Normand, K. Raghavachari, A. P. Rendell, J. C. Burant, S. S. Iyengar, J. Tomasi, M. Cossi, J. M. Millam, M. Klene, C. Adamo, R. Cammi, J. W. Ochterski, R. L. Martin, K. Morokuma, O. Farkas, J. B. Foresman and D. J. Fox, *Gaussian 16*, Revision B.01, 2016, Gaussian, Inc., , Wallingford CT.
2. A. D. Becke, Density-Functional Thermochemistry 3. The Role of Exact Exchange, *J. Chem. Phys.*, 1993, **98**, 5648-5652.
  3. C. T. Lee, W. T. Yang and R. G. Parr, Development of the Colle-Salvetti Correlation-Energy Formula into a Functional of the Electron-Density, *Phys. Rev. B*, 1988, **37**, 785-789.
  4. T. H. Dunning Jr and P. J. Hay, in *Modern Theoretical Chemistry*, ed. H. F. Schaefer III, Plenum Press, New York, 1977, vol. 3, ch. 1-28.
  5. P. J. Hay and W. R. Wadt, Ab Initio Effective Core Potentials for Molecular Calculations - Potentials for the Transition-Metal Atoms Sc to Hg, *J. Chem. Phys.*, 1985, **82**, 270-283.
  6. P. J. Hay and W. R. Wadt, Ab Initio Effective Core Potentials for Molecular Calculations - Potentials for K to Au Including the Outermost Core Orbitals, *J. Chem. Phys.*, 1985, **82**, 299-310.
  7. R. Bauernschmitt and R. Ahlrichs, Treatment of electronic excitations within the adiabatic approximation of time dependent density functional theory, *Chem. Phys. Lett.*, 1996, **256**, 454-464.
  8. M. E. Casida, C. Jamorski, K. C. Casida and D. R. Salahub, Molecular excitation energies to high-lying bound states from time-dependent density-functional response theory: Characterization and correction of the time-dependent local density approximation ionization threshold, *J. Chem. Phys.*, 1998, **108**, 4439-4449.
  9. R. E. Stratmann, G. E. Scuseria and M. J. Frisch, An efficient implementation of time-dependent density-functional theory for the calculation of excitation energies of large molecules, *J. Chem. Phys.*, 1998, **109**, 8218-8224.
  10. C. Van Caillie and R. D. Amos, Geometric derivatives of excitation energies using SCF and DFT, *Chem. Phys. Lett.*, 1999, **308**, 249-255.
  11. F. Furche and R. Ahlrichs, Adiabatic time-dependent density functional methods for excited state properties, *J. Chem. Phys.*, 2002, **117**, 7433-7447.
  12. G. Scalmani, J. Frisch, B. Mennucci, J. Tomasi, R. Cammi and V. Barone, Geometries and properties of excited states in the gas phase and in solution: Theory and application of a time-dependent density functional theory polarizable continuum model, *J. Chem. Phys.*, 2006, **124**, 094107-094104.
  13. M. Cossi, V. Barone, R. Cammi and J. Tomasi, Ab initio study of solvated molecules: A new implementation of the polarizable continuum mode, *Chem. Phys. Lett.*, 1996, **255**, 327-335.
  14. J. Tomasi, B. Mennucci and R. Cammi, Quantum mechanical continuum solvation models, *Chem. Rev.*, 2005, **105**, 2999-3093.
  15. G. M. Greetham, P. Burgos, Q. Cao, I. P. Clark, P. S. Codd, R. C. Farrow, M. W. George, M. Kogimtzis, P. Matousek, A. W. Parker, M. R. Pollard, D. A. Robinson, Z. J. Xin and M. Towrie, ULTRA: A unique instrument for time-resolved spectroscopy, *Appl. Spectrosc.*, 2010, **64**, 1311-1319.
  16. G. M. Greetham, D. Sole, I. P. Clark, A. W. Parker, M. R. Pollard and M. Towrie, Time-resolved multiple probe spectroscopy, *Rev. Sci. Instrum.*, 2012, **83**, 103107.
  17. G. M. Greetham, P. M. Donaldson, C. Nation, I. V. Sazanovich, I. P. Clark, D. J. Shaw, A. W. Parker and M. Towrie, A 100 kHz time-resolved multiple-probe femtosecond to second infrared absorption spectrometer, *Appl. Spectrosc.*, 2016, **70**, 645-653.
